# Supplementary material for: Tuning the optical and electrochemical properties of conjugated all-thiophene dendrimers via core functionalization with a benzothiadiazole unit
Source: Royal Society of Chemistry journal article supplement (doi:10.1039/c6ra25567a), 2017-01-01
Supplement: c6ra25567a1.pdf [file c6ra25567a1.pdf]

## Supporting Information

# Tuning the Optical and Electrochemical Properties of Conjugated *all*-Thiophene Dendrimers via Core Functionalization with Benzothiadiazole Unit

Wei Gao<sup>1,4</sup>, Junkai Wang<sup>2</sup>, Qun Luo<sup>1</sup>, Yi Lin<sup>3</sup>, Yuchao Ma<sup>1</sup>, Junyan Dou<sup>1</sup>, Hongwei  
Tan<sup>2,\*</sup>, Chang-Qi Ma<sup>1,\*</sup>, Zheng Cui<sup>1,\*</sup>

1 Printable Electronics Research Center, Suzhou Institute of Nano-Tech and Nano-Bionics, Chinese Academy of Sciences, 398 Ruoshui Road, SEID SIP, Suzhou, Jiangsu 215123, PR China

2 College of Chemistry, Beijing Normal University, No. 19, XinJieKouWai St., HaiDian District, Beijing, 100875, P. R. China.

3 Department of Chemistry, Xi'an Jiaotong Liverpool University, 111 Ren Ai Road, SEID SIP, Suzhou, 215123, P. R. China

4 University of Chinese Academy of Sciences, Beijing, 100049, P. R. China

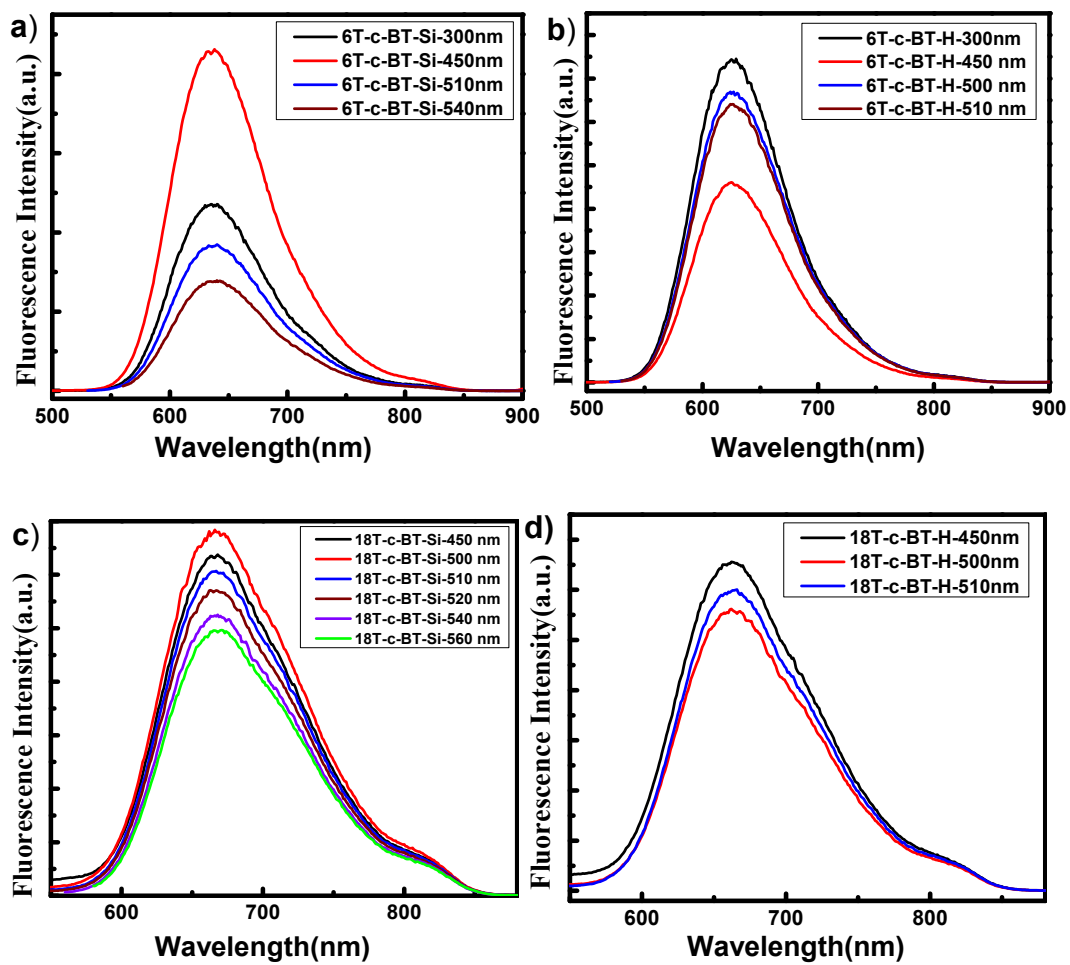

Figure S1. Emission spectra of DOT-c-BTs measured at different excitation wavelengths.

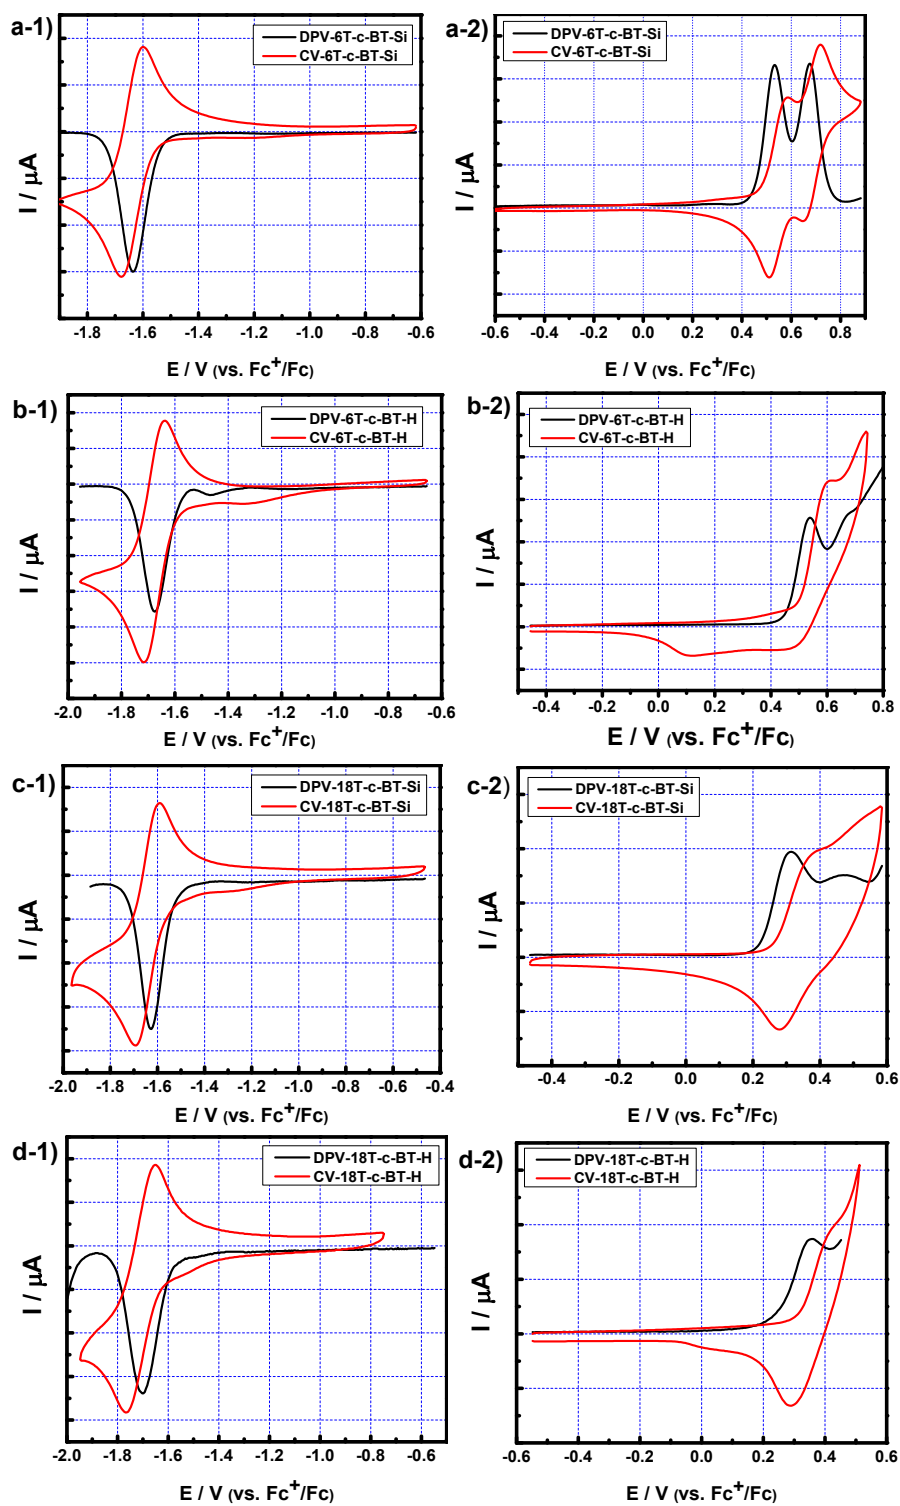

Figure S2. a, b, c) CV and DPV of 6T-c-BT-Si, 6T-c-BT-H, 18T-c-BT-Si at  $1 \times 10^{-3} \text{ mol} \cdot \text{L}^{-1}$  in  $\text{CH}_2\text{Cl}_2$  TBAPF<sub>6</sub>(0.1 M), room temperature,  $V = 100 \text{ mv} \cdot \text{S}^{-1}$ ; d) CV and DPV of 18T-c-BT-H at  $1 \times 10^{-3} \text{ mol} \cdot \text{L}^{-1}$  in *o*-dichlorobenzene, room temperature, TBAPF<sub>6</sub>(0.1 M),  $V = 100 \text{ mv} \cdot \text{S}^{-1}$ .

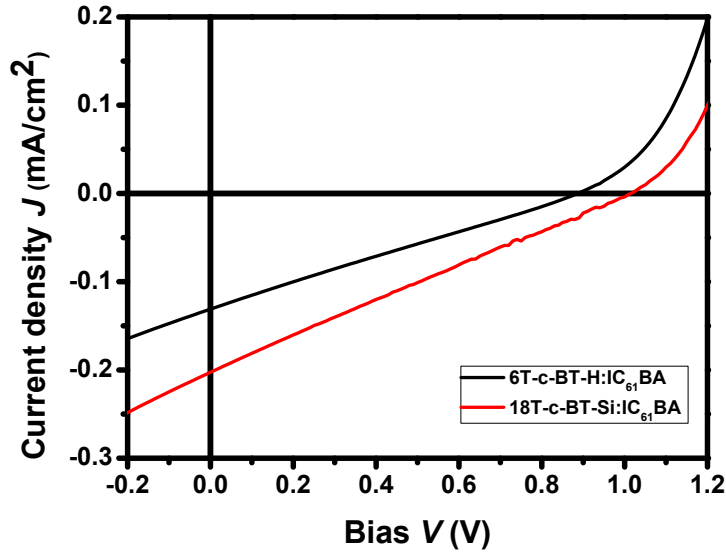

Figure S3.  $J$ - $V$  curves of the optimized DOT-c-BT: IC<sub>61</sub>BA based BHJ solar cells illuminated under standard AM1.5G conditions (100 mW cm<sup>-2</sup>)

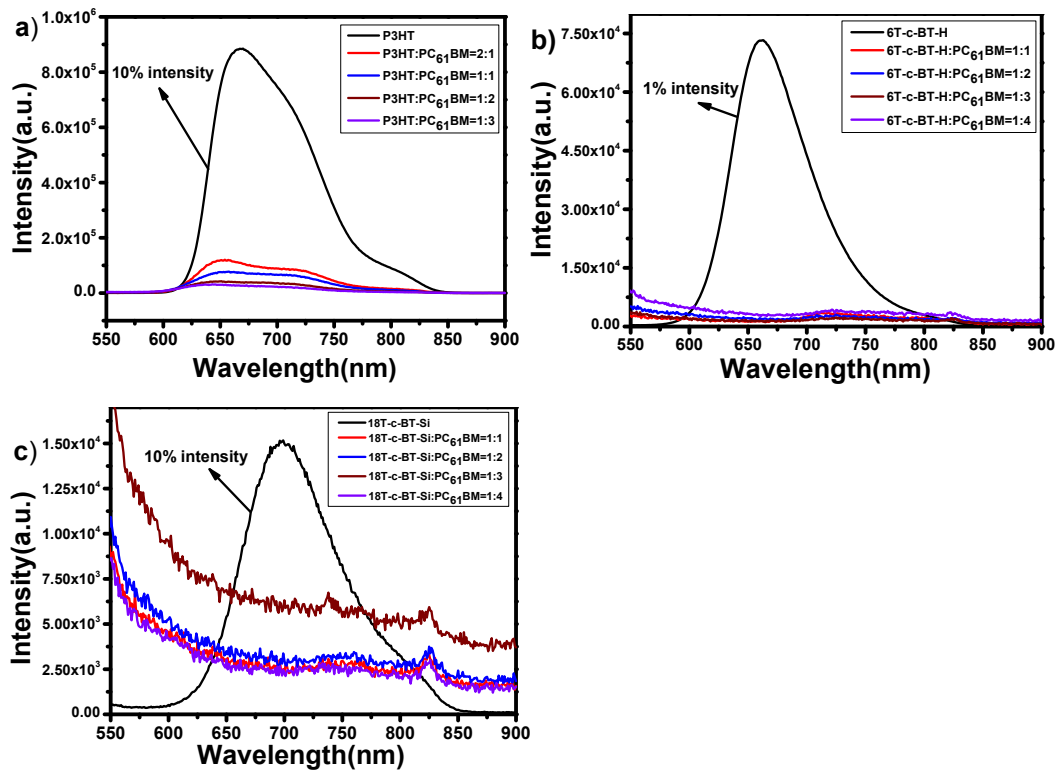

Figure S4. a) Emission spectrum of pure P3HT, and in the presence of PC<sub>61</sub>BM at different P3HT:PC<sub>61</sub>BM weight ratio; b) Emission spectrum of pure 6T-c-BT-H, and in the presence of PC<sub>61</sub>BM at different 6T-c-BT-H:PC<sub>61</sub>BM weight ratio; b) Emission spectrum of pure 18T-c-BT-Si, and in the presence of PC<sub>61</sub>BM at different 18T-c-BT-Si:PC<sub>61</sub>BM weight ratio.

## Experimental Section

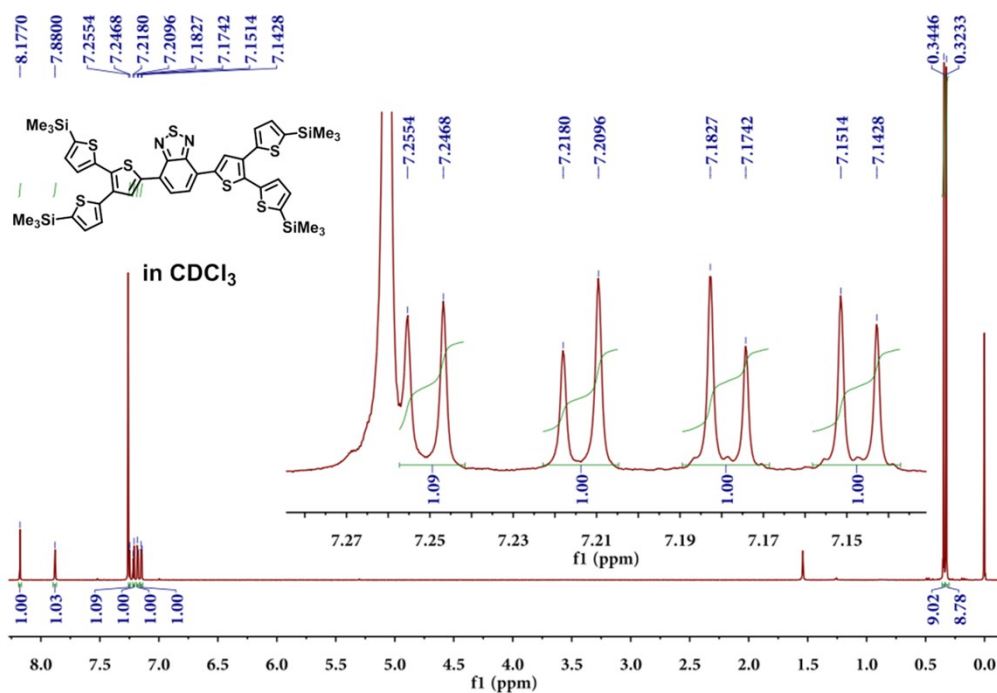

<sup>1</sup>H NMR of 6T-c-BT-Si

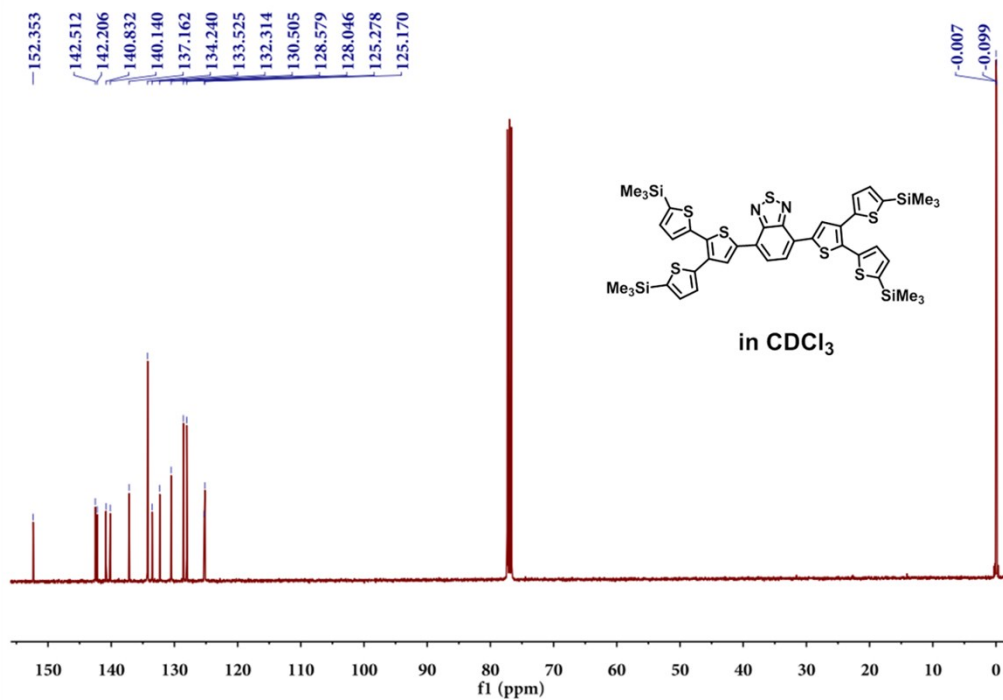

<sup>13</sup>C NMR of 6T-c-BT-Si

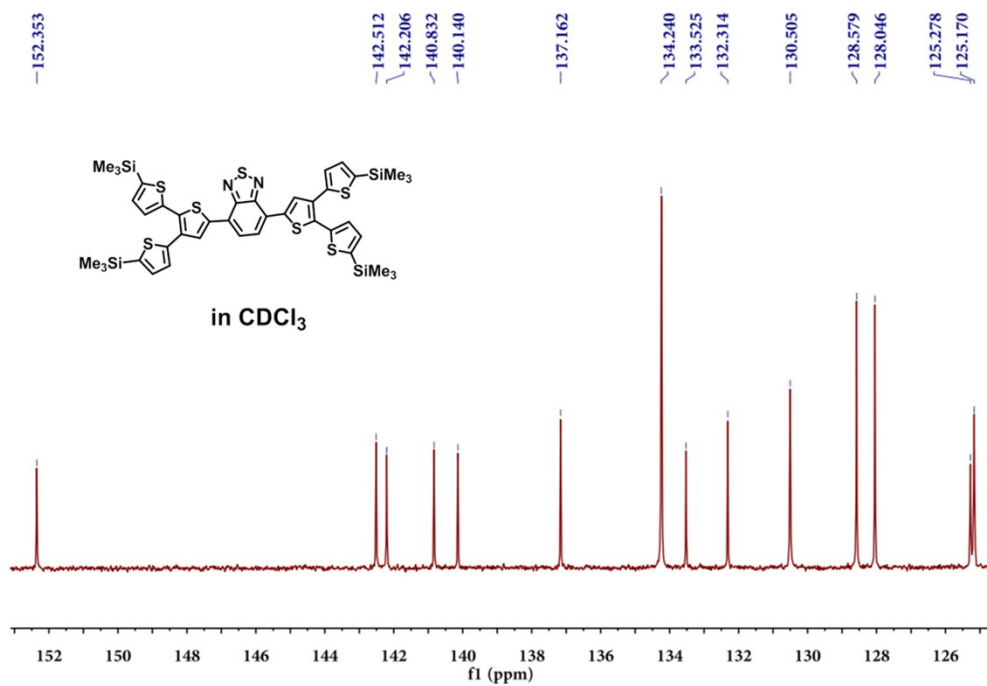

$^{13}\text{C}$  NMR of 6T-c-BT-Si

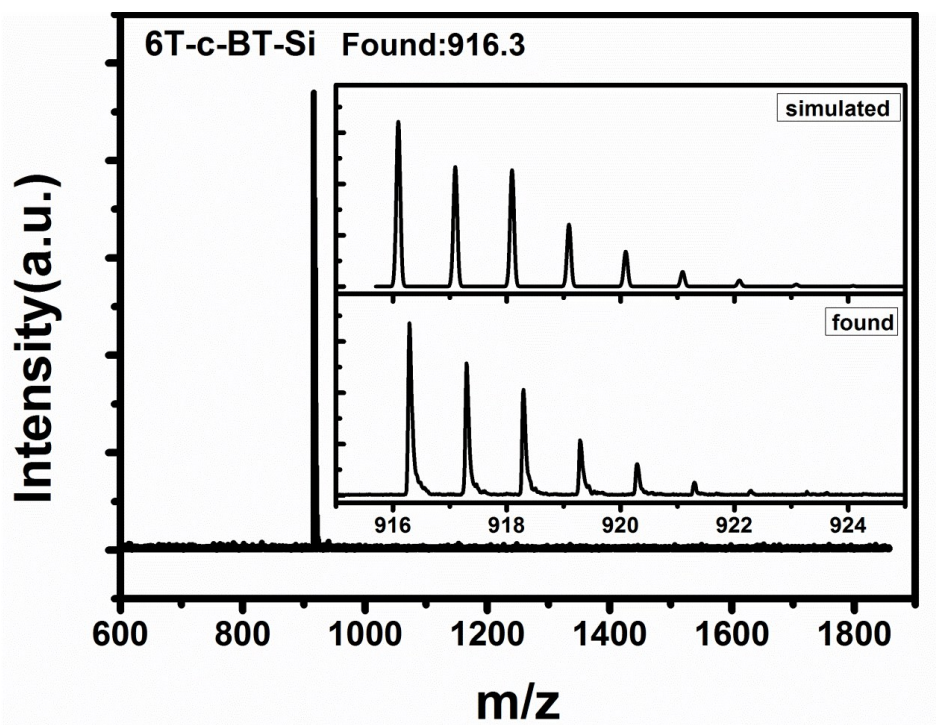

MALDI-TOF MS of 6T-c-BT-Si

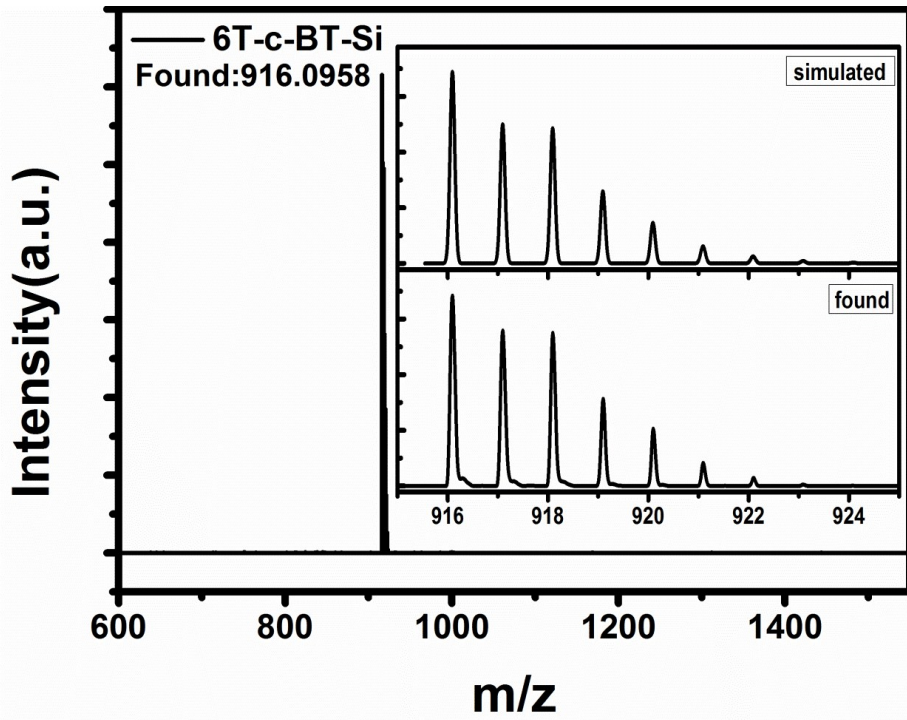

HR MS of 6T-c-BT-Si

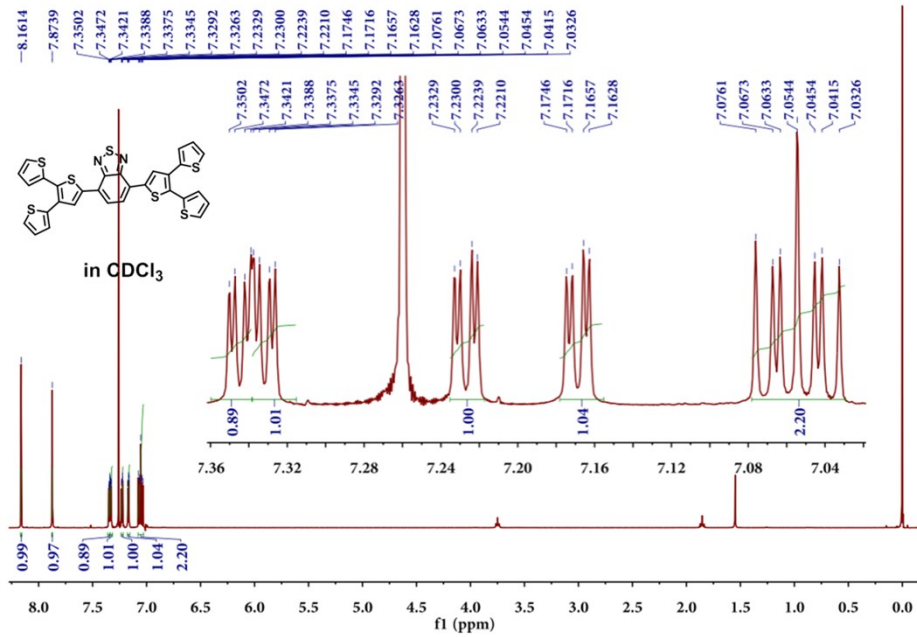

<sup>1</sup>H NMR of 6T-c-BT-H

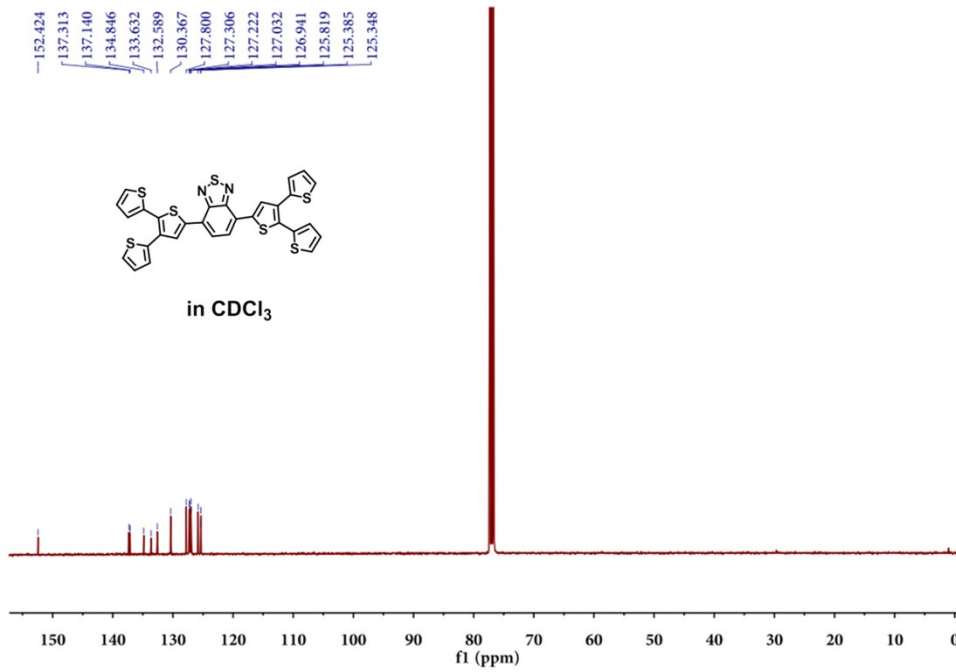

<sup>13</sup>C NMR of **6T-c-BT-H**

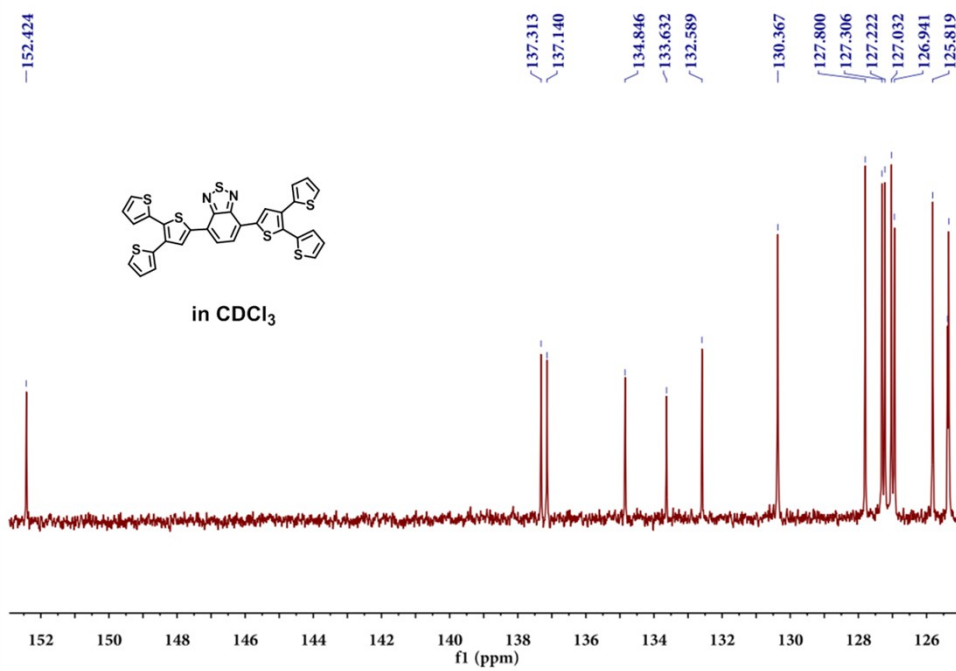

<sup>13</sup>C NMR of **6T-c-BT-H**



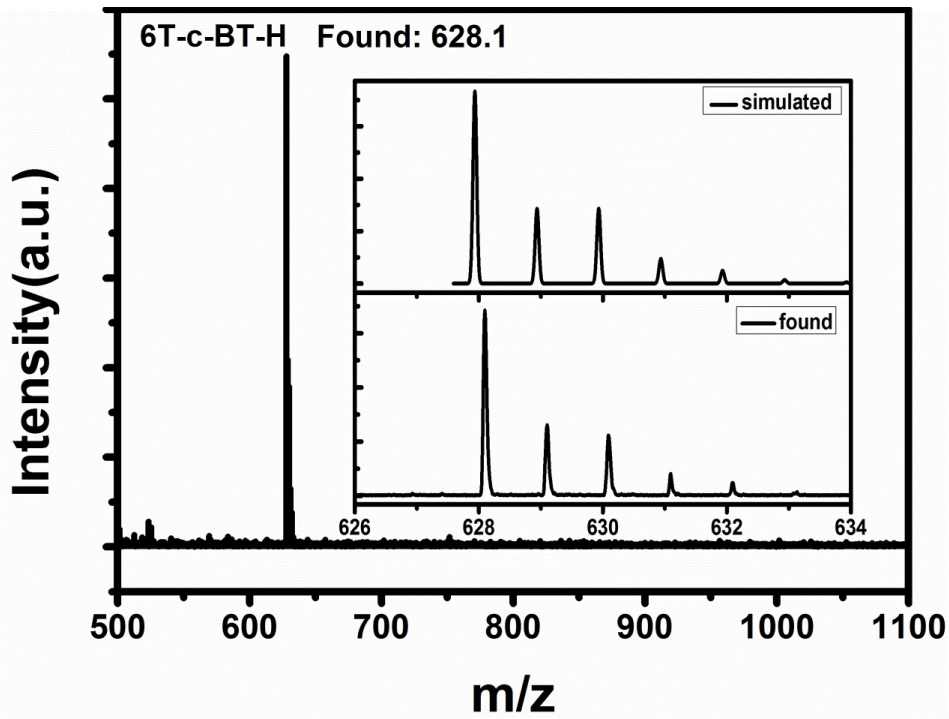

MALDI-

TOF MS of 6T-c-BT-H

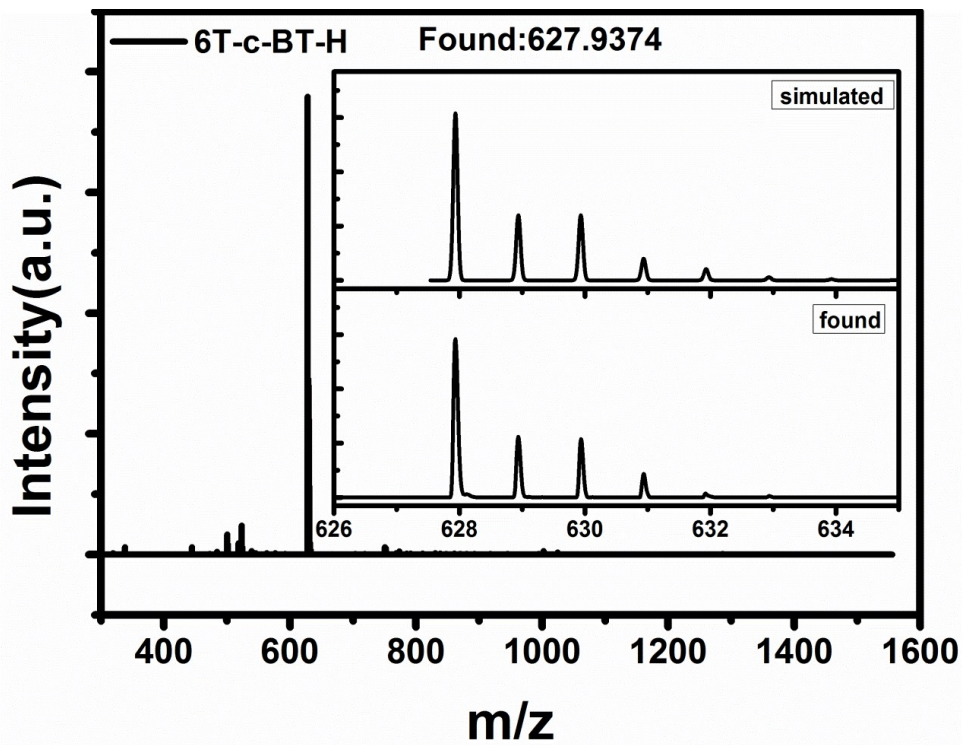

HR MS of 6T-c-BT-Si

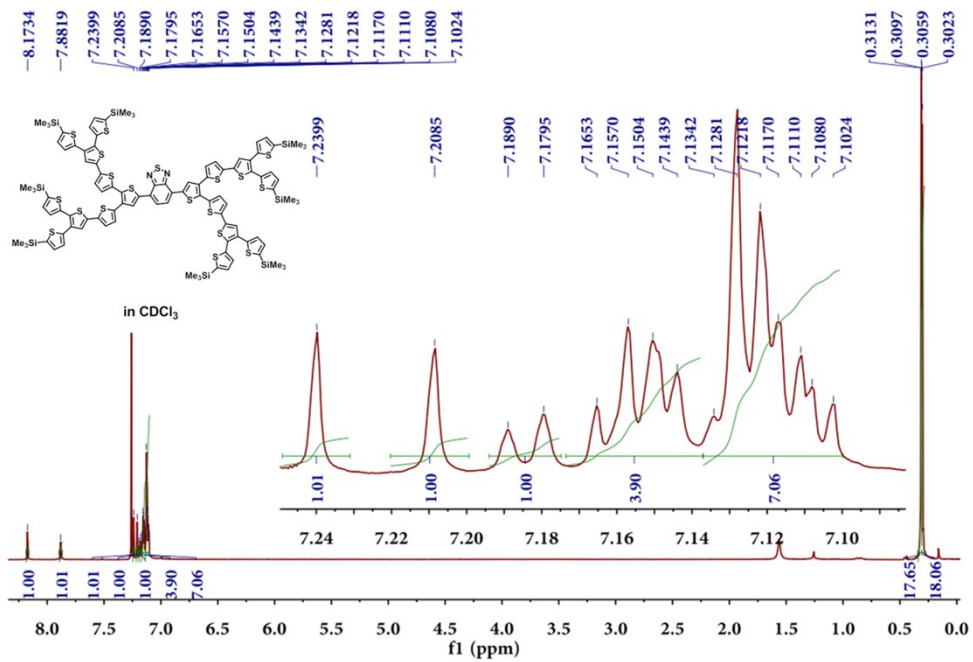

**<sup>1</sup>H NMR of 18T-c-BT-Si**

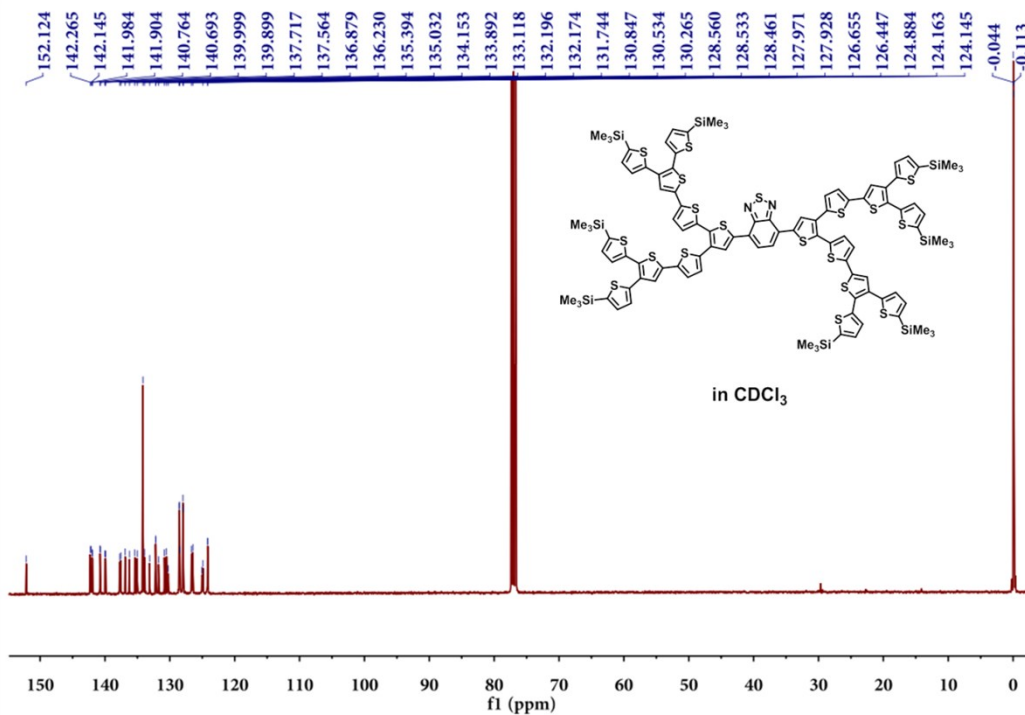

**<sup>13</sup>C NMR of 18T-c-BT-Si**

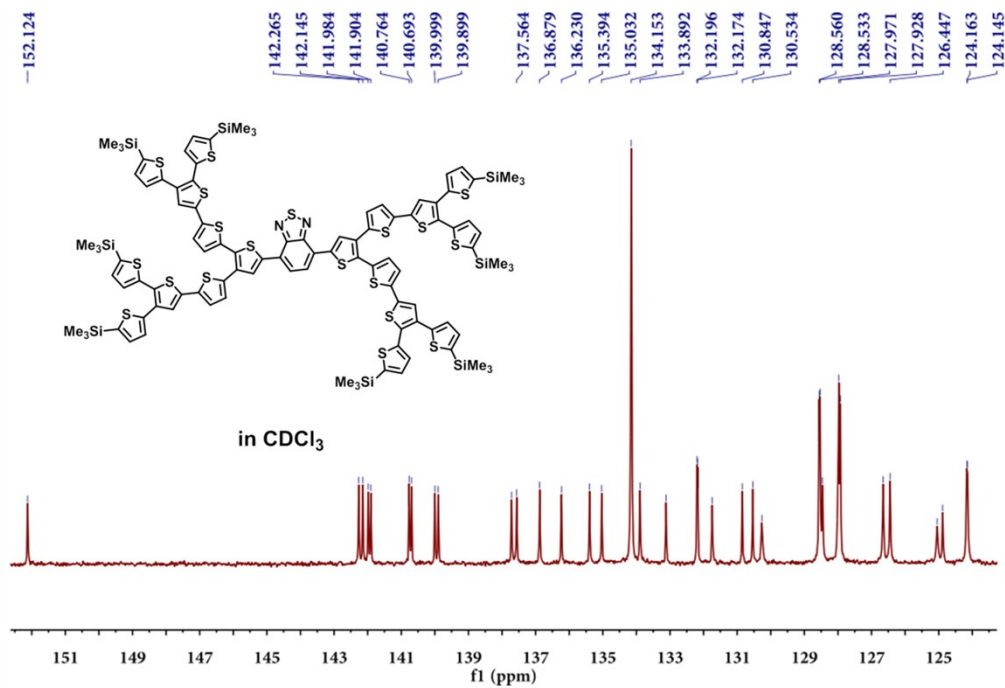

<sup>13</sup>C NMR of 18T-c-BT-Si

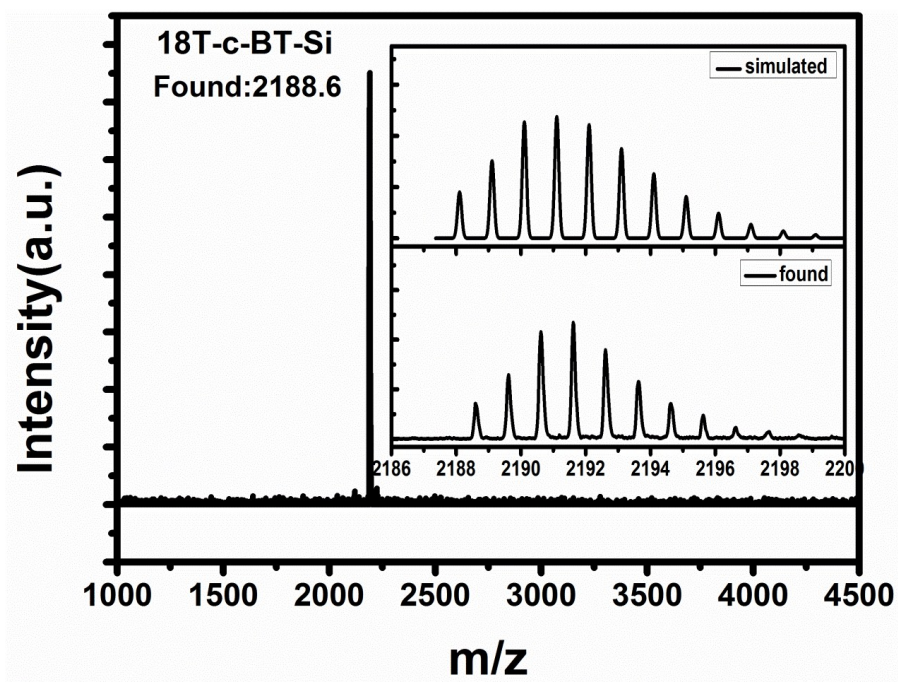

MALDI-TOF MS of 18T-c-BT-Si

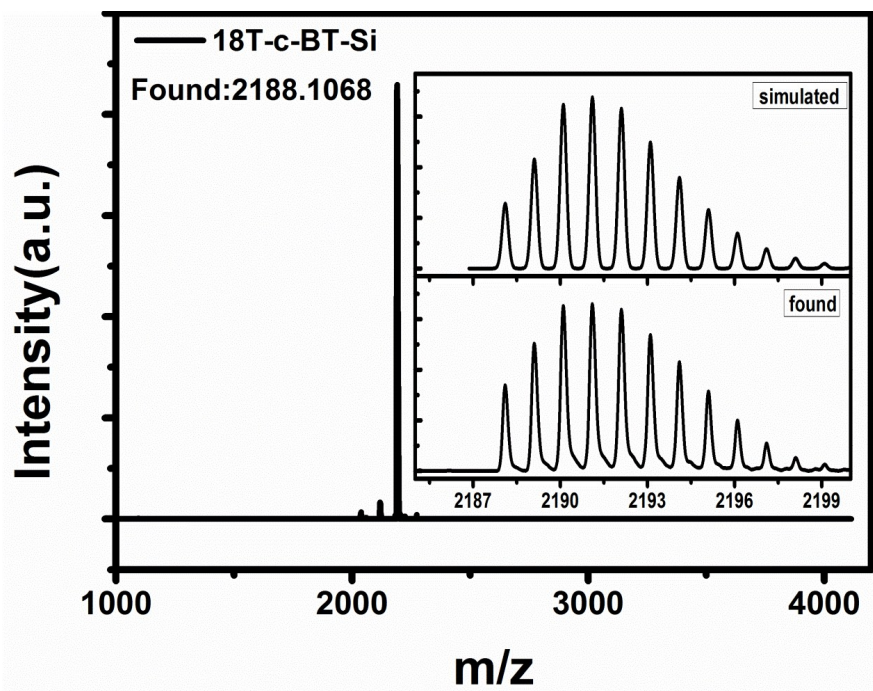

HR MS of 18T-c-BT-Si

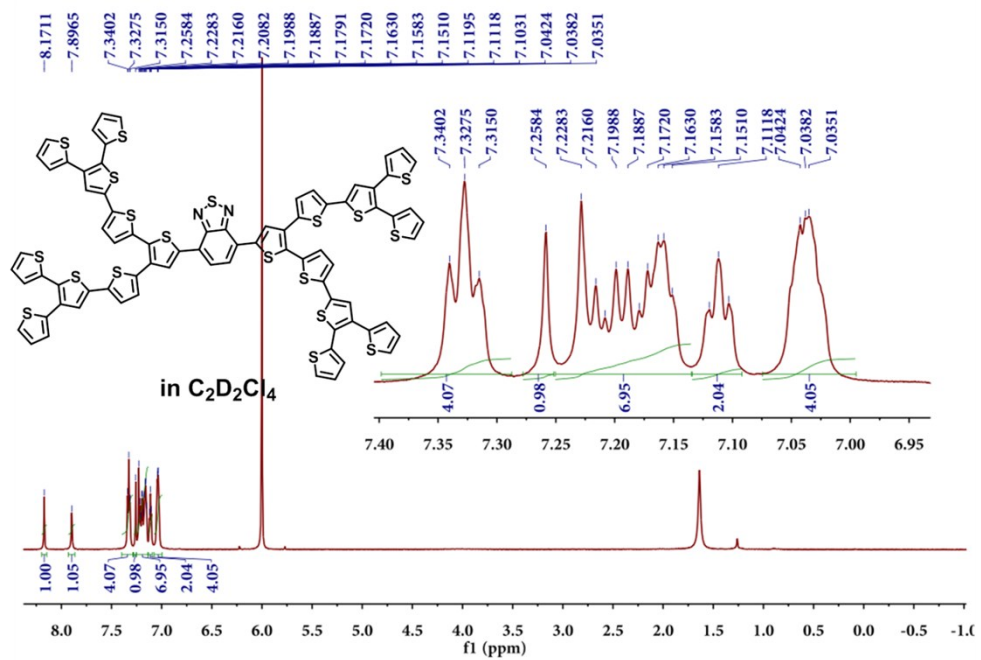

$^1H$  NMR of 18T-c-BT-H



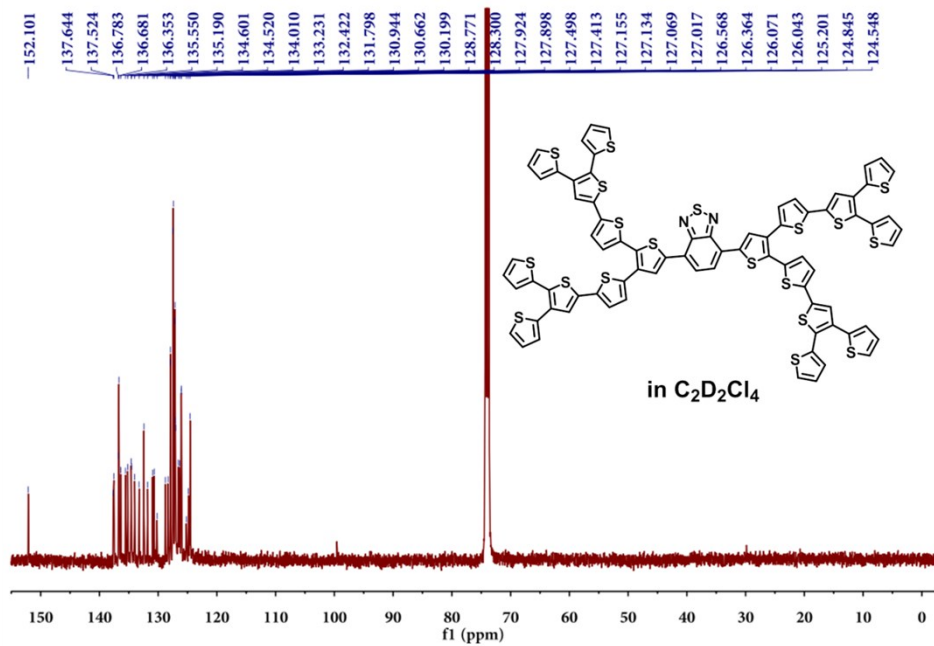

$^{13}C$  NMR of 18T-c-BT-H

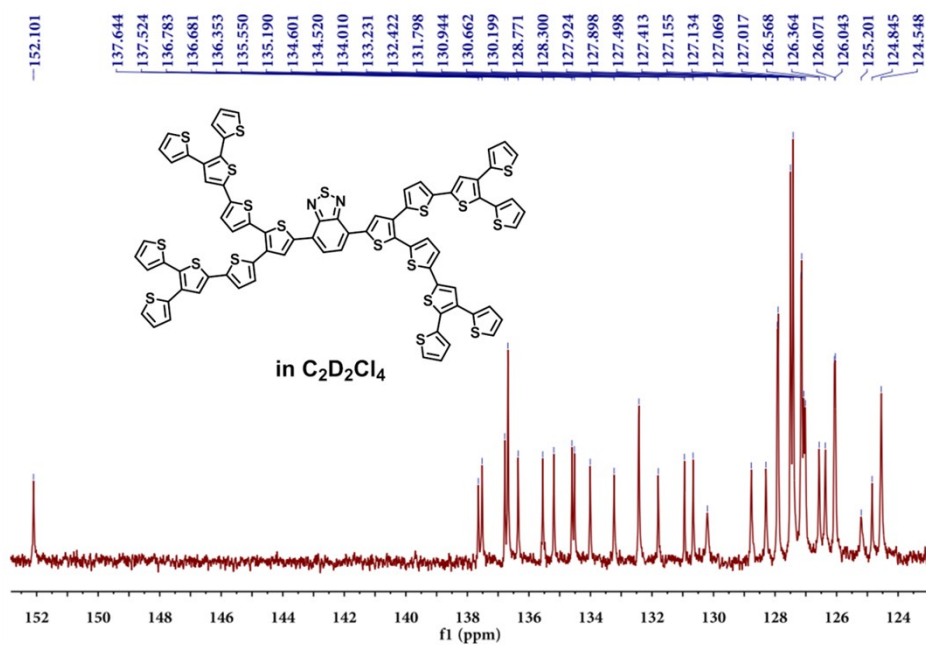

$^{13}C$  NMR of 18T-c-BT-H

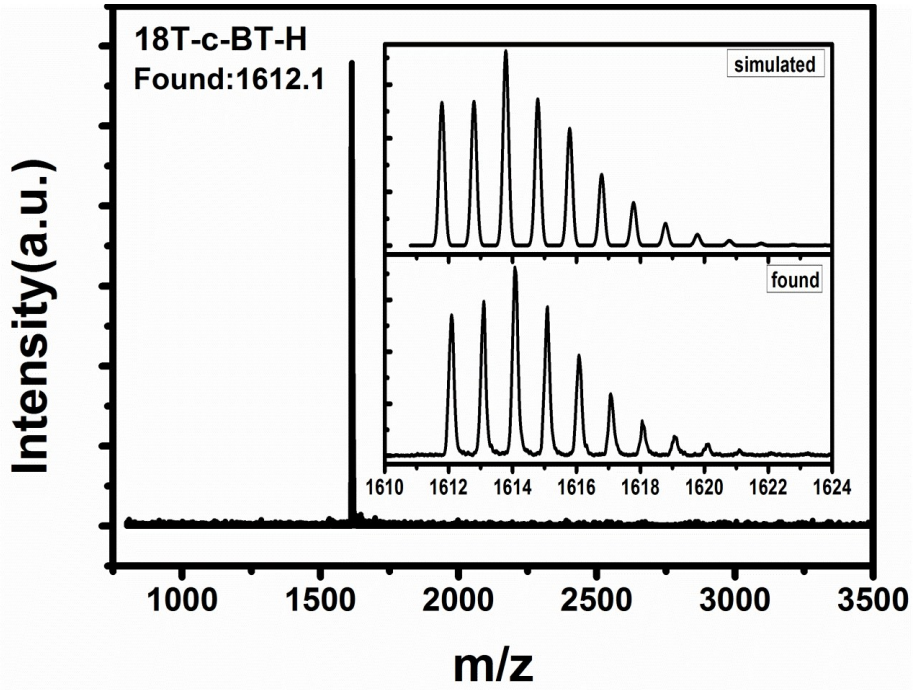

MALDI-TOF MS of 18T-c-BT-H

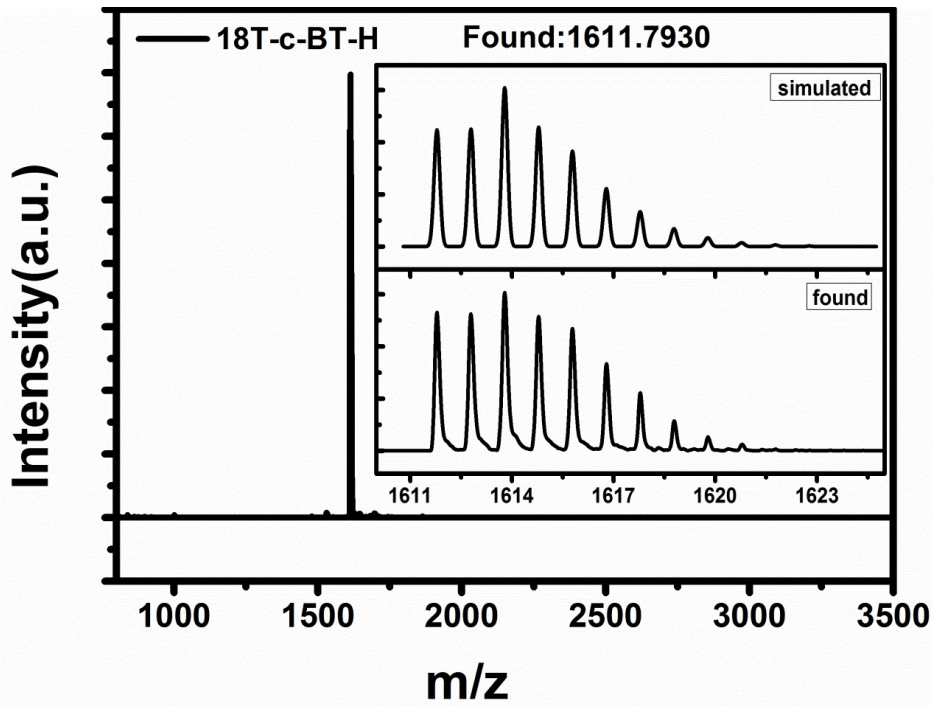

HR MS of 18T-c-BT-H
